# Supplementary material for: Determinants of Physical Activity and Sedentary Behavior in German Elementary School Physical Education Lessons
Source: Front Sports Act Living. 2020 Sep 15;2:113. doi: 10.3389/fspor.2020.00113 (PMC7739767; doi:10.3389/fspor.2020.00113)
Supplement: Supplementary file 1 [file Data_Sheet_1.xlsx]

## Sheet: Sheet1
ID	school_code	teacher_category	grade	sex	height	weight	bmi	bmi_category	sportsclub_membership	general_PA	general_PA_category	father_doing_sport	mother_doing_sport	parents_doing_sport	PE_overall_min	PE_days_analysed	PE_overall_SB	PE_overall_LPA	PE_overall_MVPA	first_PE_lesson_weekday	second_PE_lesson_weekday	third_PE_lesson_weekday	first_PE_lesson_min	second_PE_lesson_min	third_PE_lesson_min
MA13FL20	19	non-specialist	4th grade	male	145	38	18.0737	0	1			1	1	1	90	1	0.3111	0.3944	0.2944	4			90
AN21JO31	16		4th grade	male	138	30.9	16.2256	0	1	4	2	1	1	1	155	2	0.447274	0.3817	0.170965	1	2		60	95
NA13JO04	54	PE-specialist	3rd grade	male	139	32.6	16.8728	0	1	2	1	0	1	1	140	2	0.252371	0.336943	0.410718	3	5		95	45
SI13DI02	5	mixed team	2nd grade	male	129	29	17.4268	0	1	7	3	1	1	1	150	3	0.81335	0.11668	0.07	1	2	5	60	45	45
SY20FA07	5	mixed team	3rd grade	male	140	35	17.8571	0	0	5	2	0	0	0	105	2	0.255571	0.3222	0.422186	2	3		45	60
S13LI16	5	mixed team	3rd grade	male	146	30	14.0739	1	1	7	3	1	1	1	105	2	0.431786	0.2905	0.277814	2	3		45	60
CA08QU24	19	PE-specialist	1st grade	male					1	3	2	1	1	1	55	1	0.3818	0.4061	0.2121	1			55
MA05BE29	2	PE-specialist	1st grade	male	128	16	9.76562	1	1	5	2	0	0	0	45	1	0.6556	0.2667	0.0778	2			45
RA24FL25	3	non-specialist	2nd grade	male	137	37	19.7134	0	1	7	3	0		0	90	2	0.3241	0.49445	0.18145	3	4		45	45
NO29LE14	5	PE-specialist	1st grade	male	137	34	18.115		1	7	3	1	1	1	105	2	0.207914	0.504786	0.2873	4	5		45	60
KA08NI16	15	non-specialist	1st grade	male	125	21	13.44	1	1	7	3	1	1	1	135	3	0.177767	0.380267	0.441967	1	3	4	45	45	45
SI04LO18	20	mixed team	3rd grade	male	134	27	15.0368	0	1	5	2			0	90	2	0.38705	0.34255	0.2704	4	5		45	45
IR05GO29	5	PE-specialist	4th grade	male	150	43	19.1111	0	1	2	1	0	0	0	60	1	0.3694	0.3278	0.3028	5			60
JU21TA01	10	non-specialist	2nd grade	male	129.5	30.2	18.0081	0	0	7	3	0	0	0	90	1	0.1722	0.5352	0.2926	5			90
VE26YA21	16		3rd grade	male	138	30.6	16.0681	0	0	3	2	1	0	1	60	1	0.4139	0.2472	0.3389	2			60
RE25LE02	19	non-specialist	2nd grade	male	141	27	13.5808	1	0	4	2	0	1	1	90	1	0.35	0.2722	0.3778	2			90
SO15MA31	5	mixed team	2nd grade	male	128	26	15.8691	0	1	3	2	0	1	1	150	3	0.35114	0.44666	0.20224	1	2	5	60	45	45
AL07LE17	10	non-specialist	2nd grade	male	129	25	15.0231	0	0	6	3	1	1	1	135	2	0.223467	0.513567	0.263	3	4		45	90
CL04TI07	16		3rd grade	male	140	35	17.8571	0	1	7	3	1	1	1	60	1	0.5361	0.3	0.1639	2			60
ST21EL03	15	non-specialist	3rd grade	male	147	38	17.5853	0	1	7	3	1	1	1	100	1	0.2767	0.4783	0.245	2			100
SO21CH20	10	mixed team	1st grade	male	131	26.5	15.442	0	1	3	2	1	0	1	45	1	0.663	0.1333	0.2037	1			45
IN31MA16	19	PE-specialist	1st grade	male	125	23	14.72		0	7	3	0	0	0	90	1	0.5352	0.3333	0.1315	1			90
RO15A15	5	PE-specialist	4th grade	male	144	33	15.9144	0	0	6	3	0	0	0	105	2	0.182543	0.296829	0.520629	4	5		45	60
AN17JO06	5	PE-specialist	4th grade	male	140	40	20.4082	0	1	7	3	1	1	1	105	2	0.126957	0.501586	0.371457	4	5		45	60
SI29LE04	5	PE-specialist	1st grade	male	132	30	17.2176	0	0	4	2	0	0	0	105	2	0.168257	0.333314	0.498429	4	5		45	60
SI26TI07	2	PE-specialist	3rd grade	male	140	32	16.3265	0	1	5	2	1	0	1	90	2	0.2241	0.3222	0.4537	2	4		45	45
TA24DA02	5	PE-specialist	1st grade	male	130	25	14.7929	0	1	4	2	1	1	1	105	2	0.190471	0.355557	0.453971	1	5		60	45
IN25FL23	16		3rd grade	male	142	31.2	15.4731	0	1	6	3	0	1	1	60	1	0.8417	0.1306	0.0278	2			60
SA29BA22	19	PE-specialist	3rd grade	male	122	21.4	14.3779	0	1	5	2	0	0	0	90	1	0.6296	0.2204	0.15	1			90
PI16JA13	16		1st grade	male	125	22.8	14.592	0	1			1	1	1	180	3	0.4176	0.306467	0.275933	1	4	5	60	60	60
FA05ÖZ06	16		2nd grade	male	134	27.1	15.0924	0	1			0	0	0	180	2	0.251867	0.462033	0.2861	2	3		60	120
AM22PA05	16		4th grade	male	154	56	23.6128	2	1	4	2	0	1	1	120	2	0.47775	0.29725	0.225	4	5		60	60
AD08MI16	10	mixed team	3rd grade	male	146	35	16.4196	0	1	3	2	0	0	0	135	2	0.5037	0.313567	0.1827	3	5		45	90
SA12NO01	5	mixed team	3rd grade	male					1	6	3	0	1	1	105	2	0.149214	0.417457	0.433329	2	3		45	60
AN08LU06	20	PE-specialist	4th grade	male					1	7	3		0	0	90	2	0.7685	0.1852	0.0463	3	4		45	45
MA06LA31	19	non-specialist	3rd grade	male	140	29	14.7959	0	0	2	1	1	1	1	90	1	0.6296	0.3333	0.037	1			90
JE13JA12	19	PE-specialist	1st grade	male					0	3	2	1	0	1	90	1	0.4389	0.4296	0.1315	1			90
LU88CI30	10	mixed team	3rd grade	male	145	27	12.8419	1		4	2			0	135	2	0.703733	0.221	0.0753333	2	5		45	90
TE20RO17	15	non-specialist	3rd grade	male	144	40	19.2901	0	0	7	3	0	0	0	145	2	0.24369	0.525303	0.231007	1	2		45	100
PE20MA27	10	mixed team	4th grade	male	155	38.8	16.1498	0	1	3	2	0	1	1	135	2	0.248133	0.5173	0.234567	1	5		45	90
KI05KU11	20	PE-specialist	3rd grade	male	141	34	17.1018	0	0	7	3	1	1	1	105	2	0.731729	0.230129	0.0381	2	3		60	45
AB23PH30	16		4th grade	male	140	32	16.3265	0	1	3	2	1	1	1	155	2	0.541942	0.372055	0.0860419	1	2		60	95
MA05LE29	2	PE-specialist	3rd grade	male	157	59	23.9361	2	1	5	2	0	0	0	90	2	0.36665	0.4222	0.21115	2	4		45	45
SA11LI07	20	mixed team	4th grade	male	150	48.5	21.5556	2	0	5	2	0	0	0	90	2	0.7778	0.2185	0.0037	2	3		45	45
WA02KE13	16		3rd grade	male	149	50	22.5215	2	0	1	1	0	1	1	60	1	0.5028	0.4139	0.0833	2			60
CH02ER22	16		4th grade	male	145	32	15.22	0	1	7	3	1	1	1	155	2	0.482816	0.396784	0.120423	1	2		60	95
MA21FA29	15	non-specialist	1st grade	male	125	25	16	0	1	4	2		0	0	135	3	0.179033	0.548167	0.272833	1	3	4	45	45	45
El24DA11	3	PE-specialist	4th grade	male	150	41	18.2222	0	1	1	1	0	0	0	135	3	0.8062	0.1691	0.0247	1	2	3	45	45	45
SA02FE26	5	mixed team	3rd grade	male	138	31	16.2781	0	1	3	2	1	1	1	105	2	0.612686	0.296843	0.0904714	2	3		45	60
AN18BE08	20	non-specialist	1st grade	male		35			1	7	3	0	1	1	105	2	0.571414	0.396786	0.0317429	4	5		60	45
DA11FE07	20	PE-specialist	3rd grade	male	139	39	20.1853	2	0	6	3	0	1	1	105	2	0.688914	0.290457	0.0206286	2	3		60	45
DA15PA12	5	PE-specialist	1st grade	male	124	19	12.3569	1	1	7	3	0	0	0	105	2	0.317443	0.417471	0.265086	4	5		45	60
AN09LE07	20	PE-specialist	2nd grade	male	136	30.5	16.4901	0	1	6	3	1	1	1	90	2	0.82775	0.16855	0.0037	2	4		45	45
SO24NI14	20	mixed team	3rd grade	male					1	4	2	0	1	1	90	2	0.40925	0.3778	0.21295	4	5		45	45
AN23JU24	16		2nd grade	male	133.5	25	14.0274	1	0	4	2	1	1	1	180	3	0.424967	0.306467	0.2685	2	4	5	60	60	60
Li01AN03	3	non-specialist	2nd grade	male	130	29	17.1598	0	1	5	2	0	0	0	45	1	0.6815	0.1778	0.1407	1			45
BI18JA07	20	mixed team	3rd grade	male	134				1	4	2	1	1	1	45	1	0.7741	0.2185	0.0074	3			45
AL21MI13	2	PE-specialist	2nd grade	male	132	26.9	15.4385	0	1	6	3	1	0	1	45	1	0.3704	0.3074	0.3222	2			45
AN16LU06	3	PE-specialist	1st grade	male	123	20.9	13.8145	1	1	3	2	0	0	0	135	3	0.6543	0.238267	0.1074	1	2	5	45	45	45
CH01MO01	19	PE-specialist	4th grade	male	156	38	15.6147	0	0	1	1	0	0	0	90	1	0.7889	0.1296	0.0815	2			90
AN06LE01	2	PE-specialist	1st grade	male	128				1	7	3		0	0	90	2	0.2222	0.5111	0.26665	1	2		45	45
AN10AL26	54	PE-specialist	3rd grade	male	138	27.6	14.4928	1		2	1			0	140	2	0.183343	0.309496	0.507161	3	5		95	45
ES20TH18	16		1st grade	male	129	25.6	15.3837	0	0	2	1	1	1	1	120	2	0.44585	0.35555	0.19865	4	5		60	60
IV27PA30	10	non-specialist	2nd grade	male	123	23.8	15.7314	0	1	7	3	1	1	1	135	2	0.262967	0.5395	0.197533	3	4		45	90
MI30JU25	5	mixed team	3rd grade	male	141	35	17.6047	0	1	5	2	0	0	0	105	2	0.3444	0.449186	0.206357	2	3		45	60
LU88CI30	10	PE-specialist	1st grade	male	135	20	10.9739	1	1	4	2			0	135	2	0.327133	0.377767	0.295033	1	5		90	45
CL05JO12	2	PE-specialist	2nd grade	male	134	26.3	14.6469	0		6	3	1	0	1	90	2	0.26855	0.5	0.23145	1	2		45	45
IN07BA10	2	PE-specialist	1st grade	male					1			0	1	1	45	1	0.7037	0.1889	0.1074	1			45
KE18PA29	10	PE-specialist	1st grade	male	124	25	16.2591	0	1	5	2	1	1	1	135	2	0.159267	0.482733	0.358033	1	5		90	45
CA02HA07	20	PE-specialist	1st grade	male	125	25	16	0	1	7	3	1		1	45	1	0.7815	0.2	0.0185	4			45
JA21LO02	3	non-specialist	2nd grade	male		32			1	6	3	1	1	1	135	3	0.413567	0.422233	0.1642	1	3	4	45	45	45
SA27JU23	2	PE-specialist	2nd grade	male					1	6	3	1	0	1	90	2	0.3315	0.4648	0.2037	1	2		45	45
NI03JA10	20	mixed team	3rd grade	male	132	22	12.6263	1	1	7	3	0	0	0	90	2	0.46485	0.3852	0.15	4	5		45	45
LI07LI25	10	non-specialist	2nd grade	male	135	30	16.4609	0	1	5	2	0	1	1	90	1	0.1722	0.6204	0.2074	5			90
GA04RO09	16		3rd grade	male	140	29	14.7959	0	1	6	3	0	1	1	60	1	0.4889	0.4	0.1111	2			60
AN17JO18	3	PE-specialist	4th grade	male	149	42	18.9181	0	1	3	2	0	0	0	90	2	0.7037	0.25925	0.03705	2	3		45	45
DE05LU20	5	mixed team	3rd grade	male	137	38	20.2462	2	1	4	2	0	1	1	105	2	0.160329	0.354	0.485714	2	3		45	60
MY02MA25	20	non-specialist	1st grade	male					1	7	3	0	0	0	105	2	0.620657	0.260329	0.119071	4	5		60	45
TA14VA17	16		1st grade	male	130	34	20.1183	2	0	2	1	1	1	1	120	2	0.27085	0.51665	0.2125	1	4		60	60
JE23KO01	2	PE-specialist	2nd grade	male	135				1	3	2	0	0	0	90	2	0.2389	0.42225	0.3389	1	2		45	45
AN30LU09	3	PE-specialist	4th grade	male	136	28.84	15.5926	0	1	6	3	1	1	1	90	2	0.67965	0.30185	0.0185	1	2		45	45
SI19PH15	16		1st grade	male	127	24	14.88	0	1	4	2	0	1	1	180	3	0.3213	0.438	0.240733	2	3	4	60	60	60
CH19NI26	15	non-specialist	3rd grade	male	138	32	16.8032	0	1	3	2	1	1	1	100	1	0.3267	0.4333	0.24	2			100
SA27LU23	54	PE-specialist	3rd grade	male	132	28.5	16.3567	0	1	2	1	0	0	0	45	1	0.263	0.4444	0.2926	5			45
9911AXC7	19	PE-specialist	2nd grade	male						1	1			0	90	1	0.287	0.513	0.2	1			90
HE26PA16	5	PE-specialist	1st grade	male	130	38.3	22.6627	2	1	4	2	1	1	1	105	2	0.1857	0.526971	0.287329	1	5		60	45
BIAUDA08	19	non-specialist	3rd grade	male	132	26	14.9219	0	1	5	2	1	0	1	90	1	0.5574	0.3704	0.0722	4			90
AN07EN10	20	mixed team	4th grade	male	145	49	23.3056	2	0	7	3	0	0	0	45	1	0.7407	0.237	0.0222	2			45
AN04GE28	19	PE-specialist	3rd grade	male	133	28.5	16.1117	0	1	7	3	0	1	1	90	1	0.6463	0.1963	0.1574	1			90
PE23BE05	54	PE-specialist	3rd grade	male	161	58	22.3757	2	0	3	2	0	0	0	45	1	0.237	0.463	0.3	5			45
TA76JO13	3	PE-specialist	4th grade	male	145	36	17.1225	0	1	7	3	1	1	1	135	3	0.7679	0.213567	0.0185	1	2	3	45	45	45
HE12PH17	2	PE-specialist	1st grade	male	130	25.4	15.0296	0	1	5	2	1	1	1	90	2	0.137	0.55	0.31295	1	2		45	45
SI30FE03	5	mixed team	3rd grade	male	142	49	24.3007	2	1	4	2	1	0	1	45	1	0.1519	0.5185	0.3296	2			45
SI16MI07	16		2nd grade	male	137	30	15.9838	0	1	7	3	0	0	0	180	3	0.5185	0.3574	0.1241	2	4	5	60	60	60
EM14SE18	16		2nd grade	male	135	34	18.6557	0	1	3	2	1	0	1	180	2	0.6491	0.2602	0.0907333	2	3		60	120
ME29JA25	3	PE-specialist	4th grade	male	168	80.5	28.5218	2	1	3	2	1	1	1	135	3	0.6321	0.354333	0.0135667	1	2	3	45	45	45
GA04FE28	16		1st grade	male	121	26.3	17.9633	0	1	5	2	0	1	1	180	3	0.275933	0.487033	0.237067	2	3	4	60	60	60
DI07AR08	3	PE-specialist	3rd grade	male	141	42	21.1257	2	1	3	2	0	0	0	45	1	0.2185	0.5333	0.2481	2			45
IR29JO08	19	PE-specialist	1st grade	male					1	7	3	0		0	55	1	0.3364	0.4788	0.1848	1			55
IM30JO14	5	mixed team	2nd grade	male	121	21	14.3433	0	1	7	3	0	0	0	150	3	0.55887	0.31775	0.12331	1	2	5	60	45	45
KO01JE11	5	PE-specialist	1st grade	male	124	25	16.2591	0	1	6	3	1	1	1	105	2	0.258729	0.369843	0.371471	4	5		45	60
IN18JA24	16		3rd grade	male	126				1	4	2	1	1	1	60	1	0.4222	0.3889	0.1889	2			60
IN31SI22	54	PE-specialist	2nd grade	male		25								0	135	3	0.269167	0.414833	0.316033	2	3	4	45	45	45
CA22FA16	3	PE-specialist	3rd grade	male	131	32	18.6469			7	3	0	1	1	45	1	0.2407	0.3741	0.3852	2			45
PE88EL14	20	PE-specialist	2nd grade	male	128				1	7	3	0	1	1	105	2	0.628557	0.274629	0.0968143	1	2		45	60
BI08RA07	16		3rd grade	male	125	23.3	14.912	0	0	7	3	1	1	1	60	1	0.5028	0.3833	0.1139	2			60
MI25FL01	5	PE-specialist	1st grade	male	132	30	17.2176	0	0			1	1	1	105	2	0.373029	0.414257	0.212714	4	5		45	60
IN11LU06	20	PE-specialist	2nd grade	male	128	29.5	18.0054	0	1	5	2	0	0	0	90	2	0.76485	0.2296	0.00555	2	4		45	45
TA29FR17	20	PE-specialist	1st grade	male	126	25.3	15.936	0	0			1	0	1	45	1	0.8185	0.1741	0.0074	4			45
SE10NI02	2	PE-specialist	3rd grade	male	145	45	21.4031	2	1	3	2	0	0	0	90	2	0.20185	0.41665	0.3815	2	4		45	45
EV05SI10	3	PE-specialist	1st grade	male					1	3	2	1	0	1	90	2	0.65555	0.25185	0.0926	1	5		45	45
TÜ11KE24	20	PE-specialist	1st grade	male	120	35	24.3056	2	1	7	3	0	0	0	45	1	0.7926	0.2074	0	4			45
GR29NO28	19	non-specialist	2nd grade	male	145	32	15.22	0	1	4	2	1	0	1	90	1	0.4685	0.2815	0.25	5			90
NI11AN23	16		2nd grade	male					0	7	3	1	1	1	120	2	0.475	0.325	0.2	4	5		60	60
MA29MI12	19	PE-specialist	1st grade	male	129				1	7	3	1	0	1	45	1	0.5074	0.363	0.1296	5			45
FR19ER16	15	non-specialist	3rd grade	male	141	34	17.1018	0	0	7	3	0	0	0	145	2	0.242555	0.457503	0.30001	1	2		45	100
BI04FR04	2	PE-specialist	2nd grade	male	130	28	16.568	0	1	2	1	1	1	1	45	1	0.3074	0.3185	0.3741	2			45
MO05UR02	2	PE-specialist	2nd grade	male					1	3	2	0	1	1	90	2	0.22405	0.4463	0.32965	1	2		45	45
ME22SA18	19	non-specialist	2nd grade	male	128	24.3	14.8315	0	1	7	3	1	1	1	182	2	0.5412	0.4194	0.03935	3	5		91	91
BA11EN06	20	PE-specialist	2nd grade	male	128	25	15.2588	0	1	7	3	0	0	0	105	2	0.7381	0.239686	0.0222143	1	2		45	60
EL03MA05	19	PE-specialist	1st grade	male	128.5	23	13.9291	0		2	1	1	1	1	90	2	0.67405	0.29075	0.03515	1	5		45	45
MI20NE09	5	PE-specialist	4th grade	male	139	30	15.5271	0	1	3	2	0	0	0	105	2	0.252414	0.3667	0.380986	4	5		45	60
KA05LU26	10	mixed team	3rd grade	male	138	25.4	13.3375	1	1	4	2	1	1	1	45	1	0.663	0.3037	0.0333	2			45
CA08LE05	19	PE-specialist	3rd grade	male					1	4	2	1	1	1	90	1	0.5685	0.2741	0.1574	1			90
LA08BR26	54	non-specialist	1st grade	male	110	18	14.876	0	1				1	1	135	3	0.155533	0.476533	0.3679	2	3	4	45	45	45
ME20JA22	3	PE-specialist	1st grade	male					1	5	2	0	1	1	135	3	0.5432	0.342	0.1148	1	2	5	45	45	45
HE09SE16	20	PE-specialist	2nd grade	male	140	26	13.2653	1	1	5	2	0	0	0	90	2	0.84075	0.1537	0.00555	2	4		45	45
AN23BE18	5	PE-specialist	1st grade	male	140	40	20.4082	2	1	2	1	0	0	0	105	2	0.268243	0.461943	0.269814	1	5		60	45
FR03MA02	3	PE-specialist	1st grade	male	115	22	16.6352	0	0	7	3	1	1	1	90	2	0.53705	0.3389	0.12405	2	5		45	45
HE26FA30	5	PE-specialist	4th grade	male	140	38	19.3878	0	1	5	2	1	1	1	60	1	0.3278	0.4306	0.2417	5			60
RA05TI08	19	non-specialist	4th grade	male	130	29	17.1598	0	1	5	2	0	1	1	90	1	0.3648	0.4796	0.1556	3			90
TA26LU14	19	non-specialist	4th grade	male	145	31.8	15.1249	0	1	7	3	1	1	1	90	1	0.1648	0.4204	0.4148	4			90
CO24TI24	10	mixed team	3rd grade	male	135	29	15.9122	0	1	7	3	0	0	0	135	2	0.643233	0.204967	0.151867	2	5		45	90
BR28RA29	2	PE-specialist	3rd grade	male	139	38	19.6677	0	1	7	3	1	0	1	45	1	0.2037	0.4	0.3963	4			45
KR25HE23	19	PE-specialist	1st grade	male		23.2			1	5	2	0	1	1	45	1	0.4815	0.4074	0.1111	5			45
SI88MA09	2	PE-specialist	3rd grade	male	144	46.2	22.2801	2	1	7	3	0	1	1	90	2	0.15185	0.39445	0.45375	2	4		45	45
SI88MO29	19	PE-specialist	2nd grade	male					0	7	3	0	1	1	90	1	0.4537	0.3074	0.2389	1			90
ME03JO09	10	non-specialist	2nd grade	male					1	4	2	0	1	1	135	2	0.741933	0.230867	0.0271333	3	5		45	90
AN19EL21	15	non-specialist	4th grade	male	153	43.3	18.4972	0	1	6	3	1	0	1	135	2	0.4741	0.397533	0.128367	3	4		90	45
LA24LU30	19	non-specialist	3rd grade	male	132	26.8	15.3811	0	1	3	2	1	1	1	90	1	0.6944	0.2537	0.0519	5			90
SI12FI10	15	mixed team	2nd grade	male	134				1	6	3	0	0	0	155	2	0.264529	0.498881	0.23659	2	5		110	45
FI15ÖZ29	20	PE-specialist	1st grade	male	125	25	16	0	1	3	2		0	0	45	1	0.8037	0.1852	0.0111	4			45
GR30ER15	10	mixed team	3rd grade	male	148	37	16.8919	0	1			1	1	1	135	2	0.656833	0.203667	0.1395	2	5		45	90
SN02DE09	19	PE-specialist	2nd grade	male	133	32.8	18.5426	0	1	4	2	1	1	1	90	1	0.3667	0.3778	0.2556	1			90
QE15DO23	16		4th grade	male	154	55	23.1911	2	1	6	3	0	0	0	180	3	0.4111	0.438	0.150933	3	4	5	60	60	60
JA15RO02	15	non-specialist	4th grade	male	140	31.2	15.9184	0	0	1	1	0	1	1	45	1	0.5778	0.3037	0.1185	4			45
LI19VA22	16		4th grade	male	148	36	16.4354	0	0	5	2	1	1	1	155	2	0.343048	0.483874	0.173077	1	2		60	95
JS21FW09	10	PE-specialist	1st grade	male	132	30	17.2176	0	1	3	2	1	0	1	135	2	0.240767	0.3704	0.3889	1	5		90	45
CH18JO19	5	PE-specialist	4th grade	male	148	40	18.2615	0	1	3	2	1	1	1	60	1	0.2778	0.4222	0.3	5			60
NI17BE13	20	mixed team	3rd grade	male	138	40	21.004	2	1	2	1	0	0	0	45	1	0.8333	0.163	0.0037	3			45
SA14SI17	54	non-specialist	1st grade	male	134.5	27.9	15.4227	0	1	7	3	0	0	0	135	3	0.361733	0.4469	0.191367	2	3	4	45	45	45
JE13JO09	19	non-specialist	4th grade	male					0	3	2	1	0	1	90	1	0.3796	0.4778	0.1426	5			90
DE05LE18	5	mixed team	2nd grade	female					1	5	2			0	150	3	0.5078	0.35446	0.13777	1	2	5	60	45	45
LU24EM43	20	PE-specialist	3rd grade	female	135	33	18.107	0	1	7	3	0	1	1	60	1	0.7083	0.2694	0.0222	2			60
SA09SA28	54	PE-specialist	2nd grade	female	129	26.6	15.9846	0	1	4	2	1	0	1	135	3	0.256767	0.4753	0.2679	2	3	4	45	45	45
TA19JU31	54	PE-specialist	3rd grade	female	140	30	15.3061	0	1	7	3	1	1	1	45	1	0.3815	0.4926	0.1259	5			45
RO15RO15	5	PE-specialist	4th grade	female	150	36	16	0	0	5	2	0	0	0	105	2	0.315886	0.403171	0.280943	4	5		45	60
MA03HA23	15	non-specialist	1st grade	female	114	17	13.0809	1	1	5	2	0	1	1	135	3	0.5395	0.293833	0.1667	1	3	4	45	45	45
MI19AM16	19	PE-specialist	2nd grade	female	129				1	7	3	1	1	1	90	1	0.3926	0.3963	0.2111	1			90
AN24MA26	3	PE-specialist	1st grade	female	126	25.5	16.062	0	1	7	3	0	1	1	135	3	0.580233	0.327167	0.0925667	1	2	5	45	45	45
SY10TH17	2	PE-specialist	2nd grade	female	136	25	13.5164	1	1	5	2	1	1	1	90	2	0.22965	0.43705	0.3333	1	2		45	45
VEMIVASA	16		4th grade	female	134	38	21.1628	2	0	2	1	0	1	1	95	1	0.5561	0.3193	0.1246	2			95
99HHTZIR	54	PE-specialist	2nd grade	female	124	20	13.0073	1	0			0	0	0	90	2	0.2889	0.45	0.2611	2	4		45	45
CL20LE09	5	PE-specialist	4th grade	female	141	36	18.1077	0	1	5	2	1		1	105	2	0.474614	0.3	0.225386	4	5		45	60
DA23SI09	2	PE-specialist	2nd grade	female	143	47	22.984	2	1	7	3	1	1	1	45	1	0.2778	0.4037	0.3185	1			45
KR13RA02	2	PE-specialist	2nd grade	female	135	26	14.2661	0	0	6	3	0	0	0	90	2	0.32595	0.437	0.23705	1	2		45	45
SU31EL14	19	non-specialist	2nd grade	female		23.5			1	7	3	1	1	1	90	1	0.3722	0.3667	0.2611	5			90
HE10LU11	15	non-specialist	4th grade	female	150	40	17.7778	0	0	7	3	1	1	1	90	1	0.8722	0.1148	0.013	3			90
TI06TA22	19	non-specialist	1st grade	female	127	25.5	15.81	0	0	4	2	1	1	1	90	1	0.4352	0.513	0.0519	1			90
NA10EL42	5	mixed team	2nd grade	female					0	1	1	0	0	0	150	3	0.42665	0.39223	0.18112	1	2	5	60	45	45
ST17LE02	19	PE-specialist	1st grade	female					1	4	2	0	0	0	90	1	0.3981	0.3481	0.2537	1			90
JE25SE04	10	mixed team	3rd grade	female	142				1	4	2	0	1	1	45	1	0.2185	0.537	0.2444	3			45
SA16SO28	5	mixed team	3rd grade	female	130	24	14.2012	0	1	7	3	0	0	0	105	2	0.409514	0.4635	0.126943	2	3		45	60
KA02PA19	3	PE-specialist	4th grade	female	135	25	13.7174	1	1	5	2	0	1	1	135	3	0.7988	0.187633	0.0135667	1	2	3	45	45	45
KA05MA09	10	non-specialist	2nd grade	female	118	17	12.2091	1	1	4	2	1	1	1	90	1	0.2056	0.4463	0.3481	5			90
MO05PI08	2	PE-specialist	3rd grade	female	145	31	14.7444	0	1	3	2	0	1	1	45	1	0.2963	0.3889	0.3148	4			45
NI14LU10	16		1st grade	female	131	25.2	14.6845	0	1	7	3	1	1	1	180	3	0.418533	0.429633	0.151867	2	3	4	60	60	60
SA88DO12	54	PE-specialist	2nd grade	female	144	32	15.4321	0	1	7	3			0	128.5	2	0.269804	0.348918	0.381344	2	4		83.5	45
YV28CA09	19	non-specialist	3rd grade	female	131	28.6	16.6657	0	1	4	2	1	1	1	90	1	0.7685	0.1796	0.0519	4			90
LY09LE13	20	PE-specialist	4th grade	female	142	28	13.8861	1	0	5	2	1	0	1	45	1	0.7296	0.137	0.1333	3			45
JU07LA05	20	PE-specialist	3rd grade	female	125	21	13.44	1	1	6	3	1	1	1	105	2	0.736529	0.253971	0.0095	2	3		60	45
CA10SU11	2	PE-specialist	3rd grade	female	134	34	18.9352	0	0	3	2	0	1	1	90	2	0.41665	0.32595	0.2574	2	4		45	45
DA25LI13	2	PE-specialist	1st grade	female	125				1	5	2	0	0	0	90	2	0.2611	0.41665	0.3222	1	2		45	45
MA19PA27	19	non-specialist	2nd grade	female	135	30.5	16.7353	0	1	7	3	0	0	0	90	1	0.4296	0.4222	0.1481	3			90
MA20NY12	20	PE-specialist	3rd grade	female	147	36.5	16.8911	0	1	7	3	0	1	1	105	2	0.763514	0.219043	0.0174429	2	3		60	45
CH22CL24	19	PE-specialist	1st grade	female	126	25	15.747	0	0	4	2	1	1	1	90	1	0.6296	0.2556	0.1148	1			90
MA05LJ17	15	non-specialist	1st grade	female	140	30.4	15.5102	0	1	2	1	1	0	1	90	2	0.29075	0.5296	0.1796	1	3		45	45
KA11MA11	20	mixed team	3rd grade	female	132	32	18.3655	0	1	7	3	1	0	1	45	1	0.7519	0.2407	0.0074	3			45
MI19SI05	19	non-specialist	3rd grade	female	138	32	16.8032	0	1	7	3	1	1	1	90	1	0.8093	0.1852	0.0056	1			90
NE29OL10	5	PE-specialist	1st grade	female	116	21.4	15.9037	0	1	1	1	0	0	0	105	2	0.274586	0.463514	0.2619	1	5		60	45
AN06NE06	5	PE-specialist	1st grade	female	122	26	17.4684	0	1	7	3	0	0	0	105	2	0.247586	0.4698	0.282514	4	5		45	60
991425GH	2	PE-specialist	2nd grade	female	134				1	1	1			0	90	2	0.2463	0.3963	0.3574	1	2		45	45
SE13AN25	5	PE-specialist	1st grade	female	127	26	16.12	0	0	5	2	1	1	1	105	2	0.585729	0.217486	0.196843	1	5		60	45
BR29SV18	19	PE-specialist	2nd grade	female	140	35	17.8571	0	1			1	1	1	90	1	0.5648	0.3759	0.0593	1			90
NA28AN02	20	PE-specialist	3rd grade	female	142	35	17.3577	0	1	2	1	0	1	1	105	2	0.722214	0.257143	0.0206429	2	3		60	45
VI29LI16	16		3rd grade	female	126	24	15.1172	0	1	2	1	1	1	1	60	1	0.6278	0.2944	0.0778	2			60
CA27MA17	19	PE-specialist	1st grade	female	129	25.9	15.564	0	1	3	2	1	1	1	45	1	0.4704	0.4778	0.0519	5			45
DI13VA10	10	mixed team	1st grade	female	115	17.7	13.3837	1	1	6	3	0	1	1	45	1	0.4259	0.3444	0.2296	5			45
SA09LA29	19	PE-specialist	1st grade	female					1	5	2	0	1	1	45	1	0.5556	0.3778	0.0667	5			45
MA19MA13	16		4th grade	female	134	29	16.1506	0	1	2	1	0	0	0	180	3	0.5324	0.3602	0.1074	3	4	5	60	60	60
RO05SO03	16		3rd grade	female	132	36	20.6612	2						0	60	1	0.5583	0.3111	0.1306	2			60
SA02AN04	5	PE-specialist	1st grade	female	128	22	13.4277	1	1	5	2	1	1	1	105	2	0.265071	0.4508	0.284129	1	5		60	45
KO01BE07	5	PE-specialist	4th grade	female					0	4	2	1	1	1	105	2	0.6508	0.219043	0.130157	4	5		45	60
SE13RE22	19	PE-specialist	3rd grade	female	136.5	27.4	14.7057	0	0	7	3	1	1	1	90	1	0.5352	0.3759	0.0889	1			90
SA07FE13	54	PE-specialist	2nd grade	female	130	26	15.3846	0	1	4	2	1	1	1	185	3	0.435119	0.405395	0.159435	2	4	5	95	45	45
AN11SA17	15	non-specialist	4th grade	female		32			0	2	1			0	45	1	0.3556	0.5037	0.1407	4			45
HE13LI31	20	PE-specialist	2nd grade	female	128	29	17.7002	0	1	3	2	0	1	1	90	2	0.76115	0.23885	0	2	4		45	45
DAS12478	19	PE-specialist	1st grade	female	110	20	16.5289	0	1			0	0	0	45	1	0.5074	0.3778	0.1148	5			45
MA11EJ13	20	PE-specialist	2nd grade	female					0	4	2	1	1	1	105	2	0.680957	0.257129	0.0619143	1	2		45	60
EV13SO29	20	PE-specialist	1st grade	female		23.5			1	6	3	1	0	1	90	2	0.85185	0.1463	0.00185	1	4		45	45
MI09SA18	5	mixed team	2nd grade	female	122	23	15.4528	0	1	4	2	1	1	1	150	3	0.41332	0.35667	0.23001	1	2	5	60	45	45
SA15MO12	2	PE-specialist	2nd grade	female	135	32.6	17.8875	0	1	7	3	1	1	1	90	2	0.27035	0.51295	0.2167	1	2		45	45
KR12RA06	19	non-specialist	2nd grade	female	135	26	14.2661	0	0	5	2	1	1	1	90	1	0.3093	0.3481	0.3426	2			90
MA01TO25	20	PE-specialist	2nd grade	female					0	5	2	0	0	0	90	2	0.75555	0.20185	0.0426	2	4		45	45
NA25NA07	16		1st grade	female	125	27	17.28	0	1	7	3	1	1	1	120	2	0.2944	0.4403	0.2653	1	4		60	60
CH18KE16	19	non-specialist	2nd grade	female	140	45.9	23.4184	2	0	2	1	0	0	0	90	1	0.2426	0.3981	0.3593	2			90
BE20AL05	5	PE-specialist	4th grade	female		34			0	7	3	0	0	0	60	1	0.2278	0.4889	0.2833	5			60
AL06JE18	20	PE-specialist	2nd grade	female	133	30.1	17.0162	0	0	4	2	0	0	0	45	1	0.8704	0.1296	0	2			45
JO05TE10	20	PE-specialist	4th grade	female	134	37.2	20.7173	0	1	7	3	0	0	0	45	1	0.8296	0.1259	0.0444	3			45
SI04NI29	15	non-specialist	2nd grade	female	131	27.5	16.0247	0	0	2	1	1	0	1	110	1	0.4606	0.3864	0.153	2			110
CL08LA08	10	non-specialist	2nd grade	female	130	25	14.7929	0	1	5	2	1	1	1	135	2	0.251867	0.4395	0.308633	3	4		45	90
DA18DE30	19	non-specialist	2nd grade	female	125	25	16	0	1	7	3	1	1	1	90	1	0.3667	0.5	0.1333	2			90
VA14AN04	16		2nd grade	female	135	36	19.7531	2		5	2	0	0	0	180	3	0.480533	0.3778	0.141667	2	4	5	60	60	60
JU23MO18	16		4th grade	female	140	31.2	15.9184		0	2	1	1	1	1	180	3	0.576833	0.309267	0.113867	3	4	5	60	60	60
RO11CA08	10	non-specialist	2nd grade	female	128	35	21.3623	2	0	2	1	0	0	0	90	1	0.3148	0.4574	0.2278	4			90
SI06KA08	19	PE-specialist	4th grade	female					0	3	2	0	1	1	90	1	0.6852	0.1981	0.1167	2			90
AL95LI13	54	non-specialist	1st grade	female	124	30	19.5109	2	0	7	3	1	1	1	135	3	0.292567	0.477767	0.229633	2	3	4	45	45	45
MA20KA19	2	PE-specialist	3rd grade	female	142	29	14.3821	0	0	3	2	1	0	1	45	1	0.6444	0.1963	0.1593	2			45
SA08FR18	5	PE-specialist	4th grade	female	144	35	16.8789	0	1	3	2	1	1	1	60	1	0.1778	0.4472	0.375	5			60
MA11PI05	19	non-specialist	2nd grade	female	132	26.1	14.9793	0	0			1	1	1	90	1	0.4463	0.4389	0.1148	3			90
TÜ18AL28	10	mixed team	3rd grade	female	137	30	15.9838	0	0	3	2	0	0	0	135	2	0.7148	0.2111	0.0741	2	5		45	90
NE22DU09	10	mixed team	4th grade	female	150	37.5	16.6667	0	1	1	1	1	1	1	135	2	0.3716	0.4037	0.2247	1	5		45	90
EL03EL20	19	non-specialist	2nd grade	female	143				1	7	3	1	0	1	90	1	0.2481	0.5481	0.2037	2			90
EM14EL04	16		4th grade	female	150	43	19.1111	0	1			1	0	1	155	2	0.448387	0.361306	0.190345	1	2		60	95
AN21JU22	3	PE-specialist	4th grade	female	144	29	13.9853	1	1	7	3	0	1	1	90	2	0.72405	0.25185	0.02405	2	3		45	45
JU13DA10	20	PE-specialist	4th grade	female	140	31	15.8163	0	1	7	3	0	0	0	60	1	0.7528	0.2361	0.0111	1			60
GI14VA16	16		3rd grade	female	128	22	13.4277	1	1	7	3	0	0	0	60	1	0.4417	0.3333	0.225	2			60
KA06AN15	5	mixed team	3rd grade	female	146	39	18.2961	0	0	3	2	0	1	1	60	1	0.375	0.3417	0.2833	3			60
BE10LE21	15	non-specialist	2nd grade	female	133				0	7	3	0	0	0	110	1	0.2652	0.4773	0.2576	2			110
MA19LE30	16		2nd grade	female	126	21	13.2275	1	1	3	2	0	0	0	180	3	0.581467	0.321267	0.0972333	2	4	5	60	60	60
EL16NA30	19	PE-specialist	1st grade	female	133	28.4	16.0552	0	1	5	2	0	0	0	90	1	0.6741	0.2648	0.0611	1			90
PE09SO22	10	mixed team	3rd grade	female	138	28	14.7028	0	1	3	2			0	135	2	0.5321	0.283933	0.183967	3	5		45	90
AN28JA09	3	PE-specialist	3rd grade	female					1	3	2	1	1	1	45	1	0.2815	0.1296	0.5889	2			45
LAMISTFR	19	non-specialist	2nd grade	female	135	26.5	14.5405	0	0			0	0	0	90	1	0.2593	0.5019	0.2389	2			90
KA04SO25	15	non-specialist	1st grade	female					1	7	3	0	1	1	90	2	0.55745	0.36665	0.0759	3	4		45	45
SA02LI25	54	non-specialist	1st grade	female					1	6	3	1	1	1	135	3	0.383933	0.455533	0.1605	2	3	4	45	45	45
DA21RO08	2	PE-specialist	2nd grade	female	133				1	5	2	1	1	1	90	2	0.27405	0.4926	0.23335	1	2		45	45
ST03MI13	20	PE-specialist	1st grade	female	130	22.8	13.4911	1	1	7	3	0	0	0	45	1	0.7852	0.2037	0.0111	4			45
JU11TH30	16		2nd grade	female	124	21	13.6576	1		1	1	1	0	1	180	2	0.346267	0.488867	0.164833	2	3		60	120
CH28JU23	54	PE-specialist	2nd grade	female	128	28	17.0898	0	1	7	3	1		1	90	2	0.1926	0.39815	0.4093	3	4		45	45
DI23FA13	20	mixed team	3rd grade	female	135	28	15.3635	0	1	7	3	0	0	0	45	1	0.8074	0.1889	0.0037	3			45
BE26LA15	20	PE-specialist	2nd grade	female	129	27	16.225	0	1	4	2	1	1	1	60	1	0.7056	0.2444	0.05	2			60
UT12AL24	3	PE-specialist	1st grade	female					0	7	3	0	0	0	135	3	0.511133	0.376533	0.112333	1	2	5	45	45	45
CH01JU01	19	PE-specialist	3rd grade	female	148	36	16.4354	0	0	1	1	0	0	0	90	1	0.8037	0.1611	0.0352	5			90
SA01LA03	20	PE-specialist	4th grade	female					1	7	3	0	0	0	105	2	0.811114	0.168229	0.0206571	1	3		60	45
JO18SO25	10	mixed team	3rd grade	female	117	22	16.0713	0	1	7	3	0	0	0	135	2	0.690133	0.262967	0.0469	2	5		45	90
SA10JA18	16		4th grade	female	160	50	19.5312	0		0	1	0	0	0	60	1	0.5833	0.3278	0.0889	1			60
CO24IN26	20	non-specialist	1st grade	female	137.5	33.6	17.7719	0	1	6	3	1	1	1	105	2	0.603129	0.3143	0.0825714	4	5		60	45
EL27OL20	2	PE-specialist	2nd grade	female	137	40	21.3117	2	1	7	3	0	0	0	90	2	0.24815	0.42225	0.32965	1	2		45	45
MA10EV27	5	PE-specialist	1st grade	female	126	28	17.6367	0	0	2	1	1	1	1	105	2	0.257157	0.430171	0.312671	1	5		60	45
JA21GI12	20	PE-specialist	3rd grade	female	158	45	18.026	0	1	3	2	1	1	1	105	2	0.728543	0.258757	0.0127	2	3		60	45
MI22SO16	10	mixed team	3rd grade	female	140	37	18.8776	0	1	7	3	1	1	1	45	1	0.6111	0.3556	0.0333	2			45
BE30ME06	16		1st grade	female					1	6	3	1	0	1	180	3	0.470367	0.369433	0.160167	1	4	5	60	60	60
JS14AS24	20	non-specialist	1st grade	female	128	25	15.2588	0	1	7	3	1	1	1	105	2	0.573057	0.3524	0.0746429	4	5		60	45
PE04AN09	10	non-specialist	2nd grade	female	130	27.1	16.0355	0	0	7	3	0	0	0	135	2	0.369167	0.430833	0.2	3	5		45	90
ST07PA10	54	PE-specialist	3rd grade	female	140	27	13.7755	1	1	0	1	0	1	1	140	2	0.365493	0.548836	0.0857036	3	5		95	45
MI19LE21	10	PE-specialist	1st grade	female	121	24	16.3923	0	0	5	2	1	1	1	135	2	0.2691	0.3889	0.342	1	5		90	45
SI10SO04	5	PE-specialist	4th grade	female	150	51	22.6667	2	1	6	3	0	1	1	105	2	0.388871	0.358729	0.252343	4	5		45	60
UL28LE28	5	PE-specialist	1st grade	female	120	18	12.5	1	1	3	2	0	1	1	45	1	0.2667	0.4296	0.3037	5			45
EV28LA11	5	PE-specialist	4th grade	female	147	42	19.4363	0	1	4	2	1	1	1	105	2	0.358714	0.341257	0.300029	4	5		45	60
HE19FA19	10	PE-specialist	1st grade	female	120	24.5	17.0139	0	1	3	2	1	0	1	135	2	0.330867	0.440733	0.2284	1	5		90	45
ED09BE04	5	PE-specialist	4th grade	female	141	36	18.1077	0	0	2	1	1	1	1	105	2	0.493671	0.314286	0.192043	4	5		45	60
SI29LE17	2	PE-specialist	2nd grade	female	131	25.8	15.0341	0	1	5	2	1	1	1	90	2	0.3259	0.45	0.22405	1	2		45	45
DA10AM09	19	non-specialist	2nd grade	female	125				1	3	2	1	1	1	90	1	0.3685	0.3537	0.2778	5			90
CL31AM19	2	PE-specialist	2nd grade	female	128	29	17.7002	0	1	7	3	1	1	1	90	2	0.29815	0.44815	0.2537	1	2		45	45
JU04CH28	10	PE-specialist	1st grade	female	124	22	14.308	0	0	7	3	1	1	1	135	2	0.2741	0.4852	0.2407	1	5		90	45
JU02EM08	5	PE-specialist	4th grade	female	145	33	15.6956	0						0	105	2	0.603186	0.228543	0.168271	4	5		45	60
LAMIIFFR	19	PE-specialist	1st grade	female	125	24	15.36	0	0	0	1	0	0	0	45	1	0.4556	0.4519	0.0926	5			45
SU10FR06	20	mixed team	3rd grade	female	130	26.3	15.5621	0	1	4	2	1	1	1	45	1	0.6815	0.2889	0.0296	4			45
BE04LA02	3	PE-specialist	3rd grade	female	135	30	16.4609	0	1	6	3	0	0	0	45	1	0.8963	0.0926	0.0111	2			45
IR13EL11	16		2nd grade	female	123	27	17.8465	0	0	6	3	0	0	0	180	2	0.2935	0.4352	0.2713	2	3		60	120
SO15EL08	5	PE-specialist	4th grade	female		36			1	7	3	0	1	1	60	1	0.1389	0.5083	0.3528	5			60
MI22IS22	10	mixed team	1st grade	female	125	21	13.44	1	1	7	3	1	1	1	90	2	0.4278	0.37225	0.2	1	3		45	45
ST88SA88	20	PE-specialist	1st grade	female					1	4	2	0	0	0	45	1	0.5778	0.4037	0.0185	4			45
VE03NO10	19	PE-specialist	1st grade	female	127	22.9	14.198	0	1	6	3	0	1	1	90	1	0.5204	0.3444	0.1352	1			90
NA16VI18	19	non-specialist	2nd grade	female	124	21	13.6576	1	1	7	3	1	1	1	90	1	0.3926	0.513	0.0944	2			90
NA11MI08	19	non-specialist	2nd grade	female	132	26	14.9219	0	1	7	3	0	1	1	90	1	0.2815	0.4278	0.2907	5			90
ÖZ15HA31	20	PE-specialist	2nd grade	female	132	30	17.2176	0	0	7	3	0	0	0	105	2	0.720629	0.2524	0.0269714	1	2		45	60
ST19NO16	10	non-specialist	2nd grade	female					1	7	3	1	1	1	135	2	0.406167	0.469167	0.124667	3	5		45	90
EL16AN20	19	non-specialist	3rd grade	female					1	1	1	0	0	0	90	1	0.8167	0.1815	0.0019	1			90
DI23RO13	20	mixed team	3rd grade	female		28			1	5	2	0	0	0	45	1	0.8481	0.137	0.0148	3			45
SU04AL27	3	non-specialist	2nd grade	female	127				1	7	3	0	1	1	135	3	0.425933	0.4654	0.108633	1	3	4	45	45	45
ME13MA07	10	mixed team	1st grade	female	115	16.5	12.4764	1		6	3	1	0	1	135	3	0.427167	0.312367	0.2605	1	3	5	45	45	45
JU09LE28	19	non-specialist	3rd grade	female	135.5	29	15.795	0	0	4	2	0	0	0	90	1	0.5852	0.3815	0.0333	1			90
NA21PA17	19	non-specialist	2nd grade	female		28			1	4	2	1	1	1	91	1	0.6026	0.337	0.0604	3			91
MA11MA26	19	non-specialist	2nd grade	female	127	22	13.64	1	1	7	3	1	1	1	90	1	0.3667	0.4648	0.1685	2			90
GU20EL16	3	PE-specialist	4th grade	female	136	29.5	15.9494	0	1	4	2	0	1	1	135	3	0.8247	0.172833	0.00246667	1	2	3	45	45	45
JA17JL07	10	PE-specialist	1st grade	female	119	19	13.4171	1	0			0	1	1	135	2	0.182733	0.3877	0.429667	1	5		90	45
LA15MA12	19	PE-specialist	3rd grade	female	137	30	15.9838	0	1	4	2	0	1	1	90	1	0.6074	0.2574	0.1352	1			90
VE08LU02	5	PE-specialist	1st grade	female	114	22	16.9283	0	0	7	3	1	1	1	105	2	0.228586	0.450771	0.320643	4	5		45	60
OL08LE12	3	PE-specialist	3rd grade	female	127	25	15.5	0	0	1	1	0	0	0	45	1	0.3111	0.3889	0.3	2			45
JE08SI17	16		3rd grade	female	128	26.9	16.4185	0		5	2			0	60	1	0.8444	0.1278	0.0278	2			60
UL28JU04	5	PE-specialist	4th grade	female	134	25	13.9229	1	1	3	2	0	1	1	60	1	0.125	0.4	0.475	5			60
SA45FI2101	20	PE-specialist	2nd grade	female		29			1	4	2	0	0	0	45	1	0.7667	0.2185	0.0148	2			45
AN17LA26	15	non-specialist	4th grade	female					1	7	3	1	1	1	135	2	0.646933	0.2432	0.109867	3	4		90	45
EU13DI15	16		3rd grade	female	145	39.3	18.692	0	1	3	2	0	0	0	60	1	0.4972	0.3972	0.1056	2			60
SA22AN09	20	mixed team	3rd grade	female	136	30	16.2197	0	1	7	3	1	1	1	90	2	0.4463	0.42405	0.1296	4	5		45	45
TA24SE06	5	mixed team	3rd grade	female	146	45	21.1109	2	1	3	2	1	1	1	105	2	0.252414	0.522257	0.225429	2	3		45	60
SA14AL24	16		2nd grade	female	145	39.3	18.692	0	1	1	1	0	0	0	180	2	0.301833	0.476867	0.2213	2	3		60	120
CO24KI06	10	mixed team	1st grade	female	125	20	12.8	1	1	7	3	0	0	0	135	3	0.487633	0.2148	0.297567	1	3	5	45	45	45
HE88SO01	19	PE-specialist	2nd grade	female	128	26	15.8691	0	1	3	2	0	1	1	90	1	0.4519	0.3722	0.1759	1			90
MA04AL20	15	non-specialist	3rd grade	female	139	32	16.5623	0	1	7	3	1	1	1	100	1	0.44	0.3817	0.1783	2			100
KA25LE12	19	PE-specialist	3rd grade	female	130	26.1	15.4438	0	1	5	2	1	0	1	90	1	0.75	0.2444	0.0056	5			90
TA01JO17	19	non-specialist	4th grade	female	158	48	19.2277	0	0	5	2	1	1	1	90	1	0.3407	0.4444	0.2148	4			90
MI88SE25	20	PE-specialist	4th grade	female					1	7	3	0	0	0	105	2	0.742857	0.234943	0.0222	1	3		60	45
TA07EM27	19	PE-specialist	1st grade	female					1	7	3	1	0	1	45	1	0.5037	0.4	0.0963	5			45
MA05ME04	3	PE-specialist	3rd grade	female	130				1	3	2	1	0	1	45	1	0.2593	0.4444	0.2963	2			45
CL01LI17	16		2nd grade	female	133	25.2	14.2461	0	1	5	2	1	1	1	180	3	0.562033	0.317567	0.120367	2	4	5	60	60	60
JA21MA21	5	PE-specialist	1st grade	female	122	20	13.4372	1	1	4	2	0	1	1	105	2	0.314271	0.428586	0.257186	4	5		45	60
KA02RO12	54	PE-specialist	2nd grade	female	123	25.1	16.5907	0	0	5	2	0	1	1	135	3	0.2185	0.461733	0.319767	2	3	4	45	45	45
EV28KA21	5	PE-specialist	1st grade	female	121	21	14.3433	0	1	4	2	1	1	1	105	2	0.311086	0.4619	0.226957	4	5		45	60
NE22BS17	10	non-specialist	2nd grade	female	136	35	18.923	0	0			1	1	1	45	1	0.3	0.4556	0.2444	3			45
DI31EM51	19	non-specialist	1st grade	female	120				0	5	2	0	1	1	90	1	0.3148	0.6	0.0852	1			90
SA10SH22	16		4th grade	female	145	38	18.0737	0	0	0	1	0	0	0	155	2	0.509687	0.339784	0.150529	1	2		60	95
PA10MA06	15	non-specialist	2nd grade	female	125	24	15.36	0	1	5	2	1	1	1	110	1	0.2682	0.5273	0.2045	2			110
IS09AN23	3	non-specialist	2nd grade											0	135	3	0.356767	0.458033	0.1852	1	3	4	45	45	45
JU02HA08	5	PE-specialist	1st grade											0	105	2	0.158729	0.403157	0.438071	4	5		45	60
KA28JU28	54	PE-specialist	2nd grade											0	185	3	0.518014	0.266665	0.215322	2	4	5	95	45	45

## Sheet: Legend
bmi_category	sportsclub_membership	general_PA	general_PA_category	father_doing_sport	mother_doing_sport	parents_doing_sport
0 = normal	0 = no	0 = 0 days of at least 60 min of PA per normal week	0 = low	0 = no	0 = no	0 = no
1 = underweight	1 = yes	1 = 1 day of at least 60 min of PA per normal week	1 = middle	1 = yes	1 = yes	1 = yes
2 = overweight		2 = 2 days of at least 60 min of PA per normal week	3 = high
		3 = 3 days of at least 60 min of PA per normal week
		4 = 4 days of at least 60 min of PA per normal week
		5 = 5 days of at least 60 min of PA per normal week
		6 = 6 days of at least 60 min of PA per normal week
		7 = 7 days of at least 60 min of PA per normal week
